# Supplementary material for: The Molecular Profile of Soil Microbial Communities Inhabiting a Cambrian Host Rock
Source: MDPI journal article supplement (doi:10.3390/microorganisms12030513), 2024-03-02
Supplement: s1 [file s1]

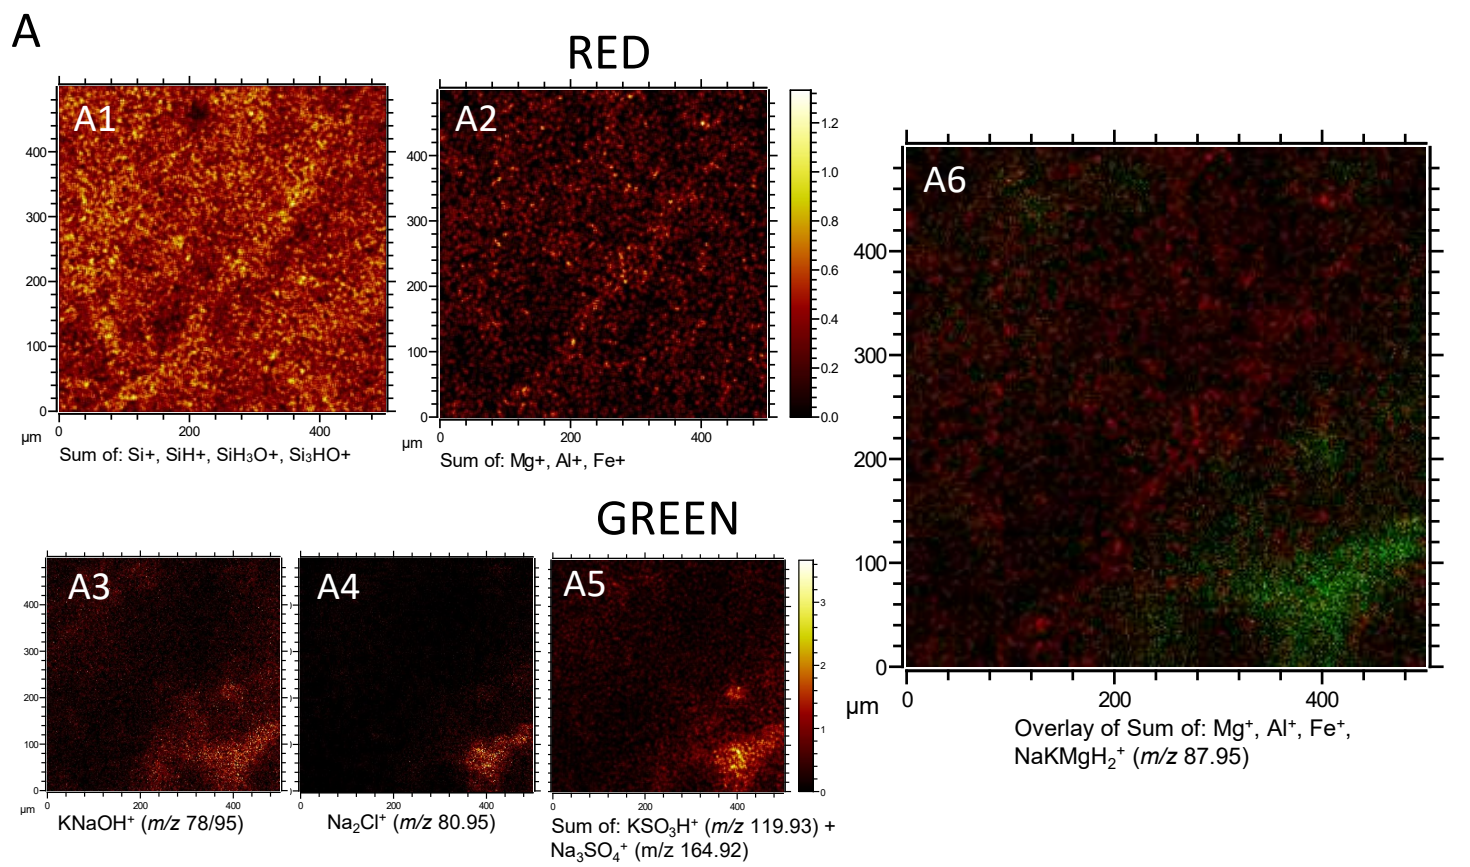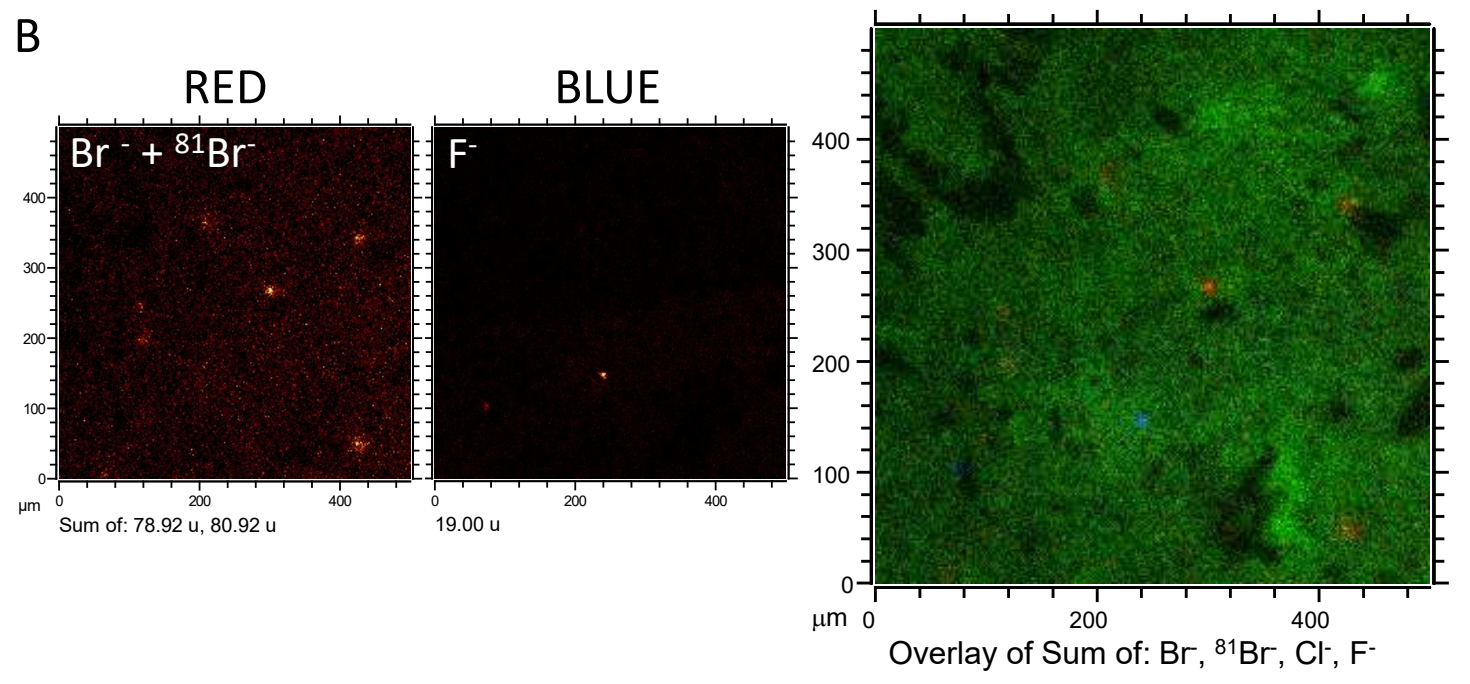

Figure S1.

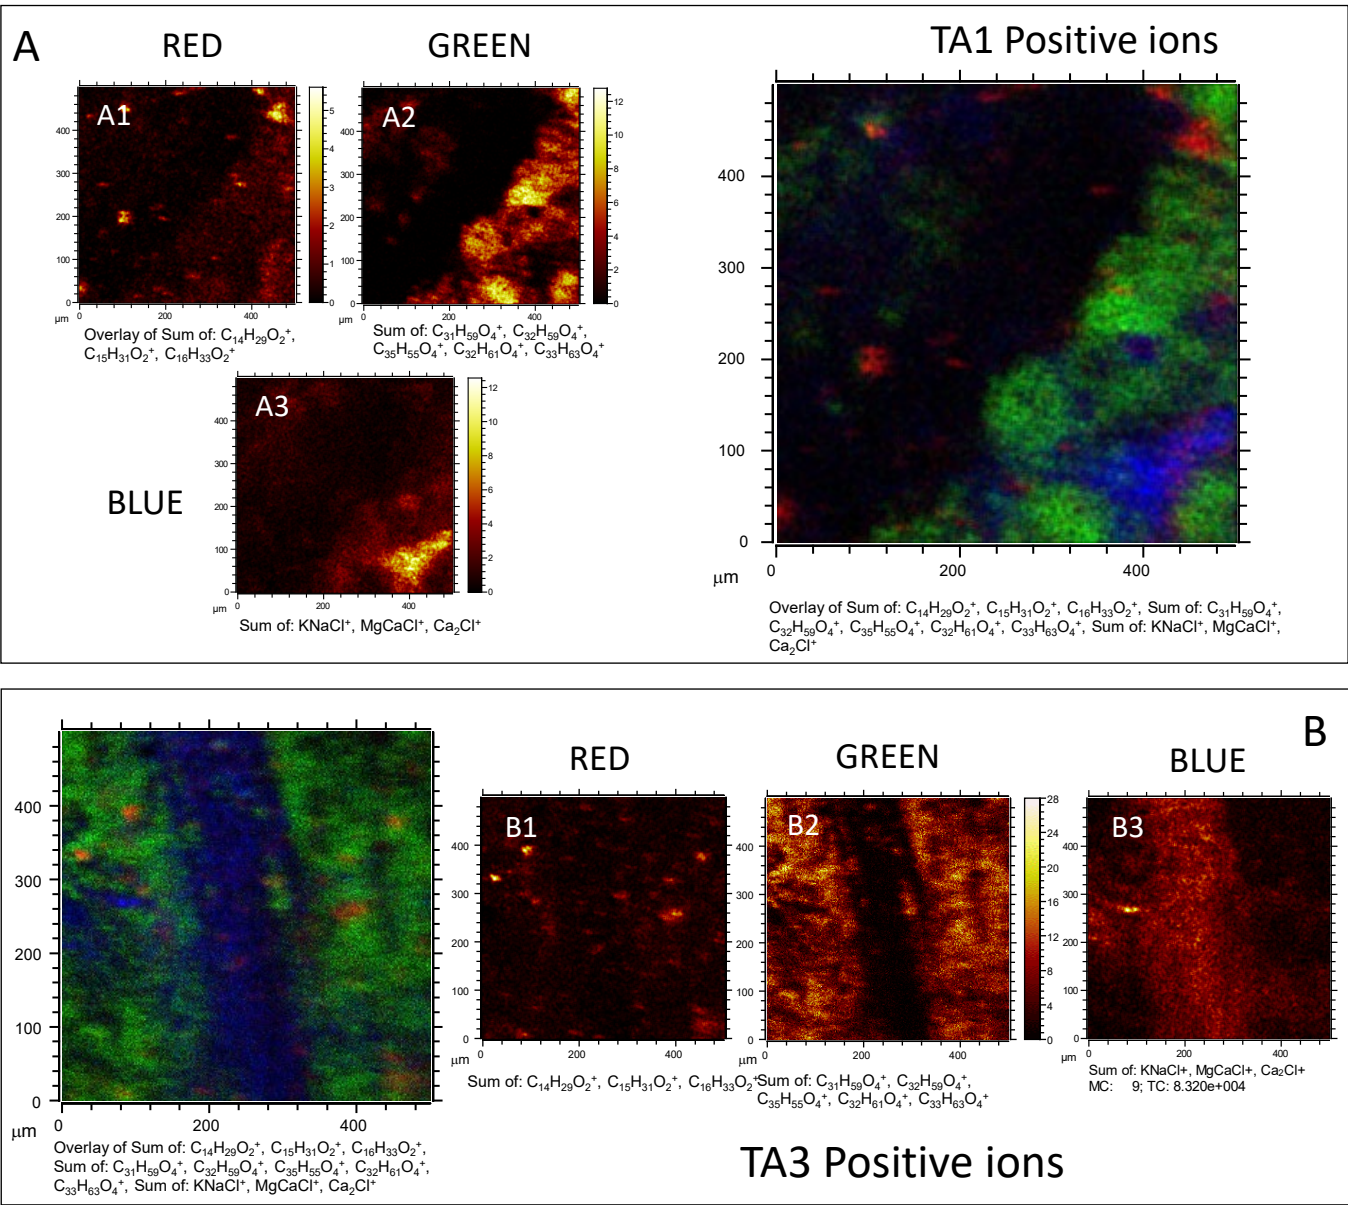

Figure S2.

**Table S1.** *n*-Fatty acid list extracted from sample95E5/2 using GC-MS

| Acid fraction                                                             |                                                |                                                |
|---------------------------------------------------------------------------|------------------------------------------------|------------------------------------------------|
| Compound (as methyl esters)                                               | Molecular formula as methyl esters             | Fatty acid formula                             |
| Butanoic acid, 3-hydroxy-, methyl ester                                   | C <sub>5</sub> H <sub>10</sub> O <sub>3</sub>  | C <sub>4</sub> H <sub>8</sub> O <sub>3</sub>   |
| Hexanoic acid, methyl ester                                               | C <sub>7</sub> H <sub>14</sub> O <sub>2</sub>  | C <sub>6</sub> H <sub>12</sub> O <sub>2</sub>  |
| Octanoic acid, methyl ester                                               | C <sub>9</sub> H <sub>18</sub> O <sub>2</sub>  | C <sub>8</sub> H <sub>16</sub> O <sub>2</sub>  |
| Nonanoic acid, methyl ester                                               | C <sub>10</sub> H <sub>20</sub> O <sub>2</sub> | C <sub>9</sub> H <sub>18</sub> O <sub>2</sub>  |
| Hexanedioic acid, dimethyl ester                                          | C <sub>8</sub> H <sub>14</sub> O <sub>4</sub>  | C <sub>6</sub> H <sub>10</sub> O <sub>4</sub>  |
| Decanoic acid, methyl ester                                               | C <sub>11</sub> H <sub>22</sub> O <sub>2</sub> | C <sub>10</sub> H <sub>20</sub> O <sub>2</sub> |
| Methyl 8-oxooctanoate, methyl ester                                       | C <sub>9</sub> H <sub>16</sub> O <sub>3</sub>  | C <sub>8</sub> H <sub>16</sub> O <sub>3</sub>  |
| Heptanedioic acid, dimethyl ester                                         | C <sub>9</sub> H <sub>16</sub> O <sub>4</sub>  | C <sub>7</sub> H <sub>12</sub> O <sub>4</sub>  |
| Methyl 3,4-di-O-methyl-β-L-arabinopyranoside                              | C <sub>9</sub> H <sub>16</sub> O <sub>5</sub>  | C <sub>6</sub> H <sub>12</sub> O <sub>5</sub>  |
| Undecanoic acid, methyl ester                                             | C <sub>12</sub> H <sub>24</sub> O <sub>2</sub> | C <sub>11</sub> H <sub>22</sub> O <sub>2</sub> |
| Nonanoic acid, 9-oxo-, methyl ester                                       | C <sub>10</sub> H <sub>18</sub> O <sub>3</sub> | C <sub>9</sub> H <sub>16</sub> O <sub>3</sub>  |
| Octanedioic acid, dimethyl ester                                          | C <sub>10</sub> H <sub>18</sub> O <sub>4</sub> | C <sub>8</sub> H <sub>14</sub> O <sub>4</sub>  |
| Nonanedioic acid, dimethyl ester                                          | C <sub>11</sub> H <sub>20</sub> O <sub>4</sub> | C <sub>9</sub> H <sub>16</sub> O <sub>4</sub>  |
| Dodecanoic acid, 4-methyl-, methyl ester ( <i>i</i> C <sub>12</sub> )     | C <sub>14</sub> H <sub>28</sub> O <sub>2</sub> | C <sub>13</sub> H <sub>26</sub> O <sub>2</sub> |
| Tridecanoic acid, methyl ester                                            | C <sub>14</sub> H <sub>28</sub> O <sub>2</sub> | C <sub>13</sub> H <sub>26</sub> O <sub>2</sub> |
| Dodecanoic acid, 10-methyl-, methyl ester ( <i>a</i> C <sub>12</sub> )    | C <sub>14</sub> H <sub>28</sub> O <sub>2</sub> | C <sub>13</sub> H <sub>26</sub> O <sub>2</sub> |
| Decanedioic acid, dimethyl ester                                          | C <sub>12</sub> H <sub>22</sub> O <sub>4</sub> | C <sub>10</sub> H <sub>18</sub> O <sub>4</sub> |
| Tridecanoic acid, 12-methyl-, methyl ester ( <i>i</i> C <sub>13</sub> )   | C <sub>15</sub> H <sub>30</sub> O <sub>2</sub> | C <sub>14</sub> H <sub>28</sub> O <sub>2</sub> |
| Tetradecanoic acid, methyl ester                                          | C <sub>15</sub> H <sub>30</sub> O <sub>2</sub> | C <sub>14</sub> H <sub>26</sub> O <sub>2</sub> |
| Undecanedioic acid, dimethyl ester                                        | C <sub>13</sub> H <sub>24</sub> O <sub>4</sub> | C <sub>11</sub> H <sub>20</sub> O <sub>4</sub> |
| Tetradecanoic acid, 12-methyl-, methyl ester ( <i>i</i> C <sub>14</sub> ) | C <sub>16</sub> H <sub>32</sub> O <sub>2</sub> | C <sub>15</sub> H <sub>30</sub> O <sub>2</sub> |
| Methyl 13-methyltetradecanoate, methyl ester ( <i>i</i> C <sub>14</sub> ) | C <sub>16</sub> H <sub>32</sub> O <sub>2</sub> | C <sub>15</sub> H <sub>30</sub> O <sub>2</sub> |
| Pentadecanoic acid, methyl ester                                          | C <sub>16</sub> H <sub>32</sub> O <sub>2</sub> | C <sub>15</sub> H <sub>30</sub> O <sub>2</sub> |
| Methyl hexadec-9-enoate                                                   | C <sub>17</sub> H <sub>32</sub> O <sub>2</sub> | C <sub>16</sub> H <sub>32</sub> O <sub>2</sub> |
| Hexadecanoic acid, methyl ester                                           | C <sub>17</sub> H <sub>34</sub> O <sub>2</sub> | C <sub>16</sub> H <sub>32</sub> O <sub>2</sub> |
| Hexadecanoic acid, 15-methyl-, methyl ester ( <i>a</i> C16)               | C <sub>18</sub> H <sub>36</sub> O <sub>2</sub> | C <sub>17</sub> H <sub>34</sub> O <sub>2</sub> |
| Hexadecanoic acid, 14-methyl-, methyl ester ( <i>i</i> C16)               | C <sub>18</sub> H <sub>36</sub> O <sub>2</sub> | C <sub>17</sub> H <sub>34</sub> O <sub>2</sub> |
| Heptadecanoic acid, methyl ester                                          | C <sub>18</sub> H <sub>36</sub> O <sub>2</sub> | C <sub>17</sub> H <sub>34</sub> O <sub>2</sub> |
| Octadecanoic acid, methyl ester                                           | C <sub>19</sub> H <sub>38</sub> O <sub>2</sub> | C <sub>18</sub> H <sub>36</sub> O <sub>2</sub> |
| Octadecanoic acid, methyl ester                                           | C <sub>19</sub> H <sub>38</sub> O <sub>2</sub> | C <sub>18</sub> H <sub>36</sub> O <sub>2</sub> |
| 11-Octadecenoic acid, methyl ester                                        | C <sub>19</sub> H <sub>36</sub> O <sub>2</sub> | C <sub>18</sub> H <sub>34</sub> O <sub>2</sub> |
| Nonadecanoic acid, methyl ester                                           | C <sub>20</sub> H <sub>40</sub> O <sub>2</sub> | C <sub>20</sub> H <sub>40</sub> O <sub>2</sub> |
| Eicosanoic acid, methyl ester                                             | C <sub>21</sub> H <sub>42</sub> O <sub>2</sub> | C <sub>20</sub> H <sub>40</sub> O <sub>2</sub> |
| Heneicosanoic acid, methyl ester                                          | C <sub>22</sub> H <sub>44</sub> O <sub>2</sub> | C <sub>21</sub> H <sub>42</sub> O <sub>2</sub> |
| Docosanoic acid, methyl ester                                             | C <sub>23</sub> H <sub>46</sub> O <sub>2</sub> | C <sub>22</sub> H <sub>44</sub> O <sub>2</sub> |
| Tricosanoic acid, methyl ester                                            | C <sub>24</sub> H <sub>48</sub> O <sub>2</sub> | C <sub>23</sub> H <sub>46</sub> O <sub>2</sub> |
| Tetracosanoic acid, methyl ester                                          | C <sub>25</sub> H <sub>50</sub> O <sub>2</sub> | C <sub>24</sub> H <sub>48</sub> O <sub>2</sub> |
| Pentacosanoic acid, methyl ester                                          | C <sub>26</sub> H <sub>52</sub> O <sub>2</sub> | C <sub>25</sub> H <sub>50</sub> O <sub>2</sub> |
| Hexacosanoic acid, methyl ester                                           | C <sub>27</sub> H <sub>54</sub> O <sub>2</sub> | C <sub>26</sub> H <sub>52</sub> O <sub>2</sub> |
| Tricosanoic acid, 10,14,18,22-tetramethyl-, methyl ester                  | C <sub>28</sub> H <sub>56</sub> O <sub>2</sub> | C <sub>27</sub> H <sub>54</sub> O <sub>2</sub> |
| Octacosanoic acid, methyl ester                                           | C <sub>29</sub> H <sub>58</sub> O <sub>2</sub> | C <sub>28</sub> H <sub>56</sub> O <sub>2</sub> |

**Table S2.** Branched, unsaturated and dicarboxylic acids from sample 95E5/2 using GC-MS.

| <b>Iso/anteiso fatty acid</b>                  | <b>Molecular formula as methyl esters</b> | <b>Alkanoic acid formula</b> | <b>Reference name</b> |
|------------------------------------------------|-------------------------------------------|------------------------------|-----------------------|
| Methyl 11-methyl-dodecanoate                   | C14H28O2                                  | C13H26O2                     | 11-isoC12             |
| Dodecanoic acid, 10-methyl-, methyl ester      | C14H28O2                                  | C13H26O2                     | 12-anteisoC12         |
| Tridecanoic acid, 12-methyl-, methyl ester     | C15H30O2                                  | C14H28O2                     | 12-isoC13             |
| Methyl 13-methyltetradecanoate                 | C17H34O2                                  | C16H32O2                     | 13-isoC15             |
| Tetradecanoic acid, 12-methyl-, methyl ester   | C17H34O2                                  | C16H32O2                     | 12-anteisoC15         |
| Hexadecanoic acid, 15-methyl-, methyl ester    | C18H36O2                                  | C17H34O2                     | 15-isoC17             |
| Hexadecanoic acid, 14-methyl-, methyl ester    | C18H36O2                                  | C17H34O2                     | 14-anteisoC17         |
| Methyl 20-methyl-heneicosanoate                | C23H46O2                                  | C22H44O2                     | 20-isoC21             |
| Methyl 21-methyl-heneicosanoate                | C23H46O2                                  | C22H44O2                     | 21-anteisoC21         |
| Methyl 21-methyldocosanoate                    | C24H48O2                                  | C23H46O2                     | 21-isoC22             |
| Methyl 20-methyl-docosanoate                   | C24H48O2                                  | C23H46O2                     | 20-anteisoC22         |
| Methyl 21-methyl-tetracosanoate                | C26H52O2                                  | C25H50O2                     | 21-isoC24             |
| Methyl 22-methyl-tetracosanoate                | C26H52O2                                  | C25H50O2                     | 22-anteisoC24         |
| Methyl indet methyl-pentacosanoate             | C27H54O2                                  | C26H52O2                     | IsoC25                |
| Methyl 20-methyl-hexacosanoate                 | C28H56O2                                  | C27H54O2                     | 20-isoC27             |
| Methyl 21-methyl-hexacosanoate                 | C28H56O2                                  | C27H54O2                     | 21-anteisoC27         |
|                                                |                                           |                              |                       |
| <b>Methyl branched fatty acid</b>              | <b>Molecular formula as methyl esters</b> | <b>Alkanoic acid formula</b> | <b>Reference name</b> |
| Methyl 8-oxooctanoate                          |                                           |                              |                       |
| Undecanoic acid, 10-methyl-, methyl ester      | C13H26O2                                  | C12H24O2                     | 10Me-C11              |
| Dodecanoic acid, 4-methyl-, methyl ester       | C14H28O2                                  | C13H26O2                     | 4Me-C12               |
| Methyl Z-11-tetradecenoate                     | C16H30O2                                  | C14H26O2                     | 11Me-C14:1            |
| Pentadecanoic acid, 14-methyl-, methyl ester   | C17H34O2                                  | C16H32O2                     | 14Me-C15              |
| Pentadecanoic acid, 13-methyl-, methyl ester   | C17H34O2                                  | C16H32O2                     | 13Me-C15              |
| Methyl 10-methyl-hexadecanoate                 | C18H36O2                                  | C17H34O2                     | 10Me-C16              |
|                                                |                                           |                              |                       |
| <b>Unsaturated n-FAs</b>                       | <b>Molecular formula as methyl esters</b> | <b>Alkanoic acid formula</b> | <b>Reference name</b> |
| 9,12-Octadecadienoic acid (Z,Z)-, methyl ester | C19H34O2                                  | C18H32O2                     | C18:2w9,12            |
| 9-Octadecenoic acid (Z)-, methyl ester         | C19H36O2                                  | C18H34O2                     | C18:1w9               |
| 11-Octadecenoic acid, methyl ester             | C19H36O2                                  | C18H34O2                     | C18:1w11              |
|                                                |                                           |                              |                       |
| <b>Dicarboxylic fatty acids</b>                | <b>Molecular formula as methyl esters</b> | <b>Alkanoic acid formula</b> | <b>Reference name</b> |
| Hexanedioic acid, dimethyl ester               | C8H14O4                                   | C6H10O4                      | di-C16                |
| Octanedioic acid, dimethyl ester               | C10H18O4                                  | C8H14O4                      | di-C18                |
| Nonanedioic acid, dimethyl ester               | C11H20O4                                  | C9H16O4                      | di-C19                |
| Docosanedioic acid, dimethyl ester             | C24H46O4                                  | C22H42O4                     | di-C22                |



**Table S3.** Polar fraction extracted from sample 95E5/2 using GC-MS.

| Polar fraction                                                                          |                                                                                                                  |                                                                                                              |
|-----------------------------------------------------------------------------------------|------------------------------------------------------------------------------------------------------------------|--------------------------------------------------------------------------------------------------------------|
| Compound                                                                                | TMS molecular formula                                                                                            | Molecular formula                                                                                            |
| 2-Ethylhexanol, TMS derivative                                                          | C <sub>11</sub> H <sub>26</sub> OSi                                                                              | C <sub>8</sub> H <sub>18</sub> O                                                                             |
| 3-Octen-2-ol, (E)-, TMS derivative                                                      | C <sub>11</sub> H <sub>24</sub> OSi                                                                              | C <sub>8</sub> H <sub>16</sub> O                                                                             |
| 2-Octene, 2-(trimethylsilyloxy)-                                                        | C <sub>11</sub> H <sub>24</sub> OSi                                                                              | C <sub>8</sub> H <sub>16</sub> O                                                                             |
| Diethylene glycol, 2TMS derivative                                                      | C <sub>10</sub> H <sub>26</sub> O <sub>3</sub> Si <sub>2</sub>                                                   | C <sub>4</sub> H <sub>10</sub> O <sub>3</sub>                                                                |
| Glycerol, 3TMS derivative                                                               | C <sub>12</sub> H <sub>32</sub> O <sub>3</sub> Si <sub>3</sub>                                                   | C <sub>3</sub> H <sub>8</sub> O <sub>3</sub>                                                                 |
| 1,12-Dodecanediol, 2TMS derivative                                                      | C <sub>18</sub> H <sub>42</sub> O <sub>2</sub> Si <sub>2</sub>                                                   | C <sub>12</sub> H <sub>26</sub> O <sub>2</sub>                                                               |
| Benzene, 2,4-diisocyanato-1-methyl-<br>phenoxyethanol, TMS derivative                   | C <sub>9</sub> H <sub>6</sub> N <sub>2</sub> O <sub>2</sub><br>C <sub>11</sub> H <sub>18</sub> O <sub>2</sub> Si | C <sub>9</sub> H <sub>6</sub> N <sub>2</sub> O <sub>2</sub><br>C <sub>8</sub> H <sub>10</sub> O <sub>2</sub> |
| 1-Undecanol, TBDMS derivative                                                           | C <sub>17</sub> H <sub>38</sub> OSi                                                                              | C <sub>11</sub> H <sub>24</sub> O                                                                            |
| Triethylene glycol, 2TMS derivative                                                     | C <sub>12</sub> H <sub>30</sub> O <sub>4</sub> Si <sub>2</sub>                                                   | C <sub>6</sub> H <sub>14</sub> O <sub>4</sub>                                                                |
| Tripropylene glycol monomethyl ether, TMS derivative                                    | C <sub>13</sub> H <sub>30</sub> O <sub>4</sub> Si                                                                | C <sub>7</sub> H <sub>16</sub> O <sub>3</sub>                                                                |
| 1-Dodecanol, TMS derivative                                                             | C <sub>15</sub> H <sub>34</sub> OSi                                                                              | C <sub>12</sub> H <sub>26</sub> O                                                                            |
| 1-Tridecanol, TMS derivative                                                            | C <sub>16</sub> H <sub>36</sub> OSi                                                                              | C <sub>13</sub> H <sub>28</sub> O                                                                            |
| Pimelic acid, 2TMS derivative                                                           | C <sub>13</sub> H <sub>28</sub> O <sub>4</sub> Si <sub>2</sub>                                                   | C <sub>7</sub> H <sub>12</sub> O <sub>4</sub>                                                                |
| 2-Phenylisopropanol, TMS derivative                                                     | C <sub>12</sub> H <sub>20</sub> OSi                                                                              | C <sub>9</sub> H <sub>12</sub> O                                                                             |
| 1-Tetradecanol, TMS derivative                                                          | C <sub>17</sub> H <sub>38</sub> OSi                                                                              | C <sub>14</sub> H <sub>30</sub> O                                                                            |
| 1-Pentadecanol, TMS derivative                                                          | C <sub>18</sub> H <sub>40</sub> OSi                                                                              | C <sub>15</sub> H <sub>32</sub> O                                                                            |
| 1-Hexadecanol, TMS derivative                                                           | C <sub>19</sub> H <sub>42</sub> OSi                                                                              | C <sub>16</sub> H <sub>34</sub> O                                                                            |
| 1-Heptadecanol, TMS derivative                                                          | C <sub>20</sub> H <sub>44</sub> OSi                                                                              | C <sub>17</sub> H <sub>36</sub> O                                                                            |
| 1-Octadecanol, TMS derivative                                                           | C <sub>21</sub> H <sub>46</sub> OSi                                                                              | C <sub>18</sub> H <sub>38</sub> O                                                                            |
| 1-Nonadecanol, TMS derivative                                                           | C <sub>22</sub> H <sub>48</sub> OSi                                                                              | C <sub>19</sub> H <sub>40</sub> O                                                                            |
| 18-Methyl-nonadecanol, trimethylsilyl ether                                             | C <sub>23</sub> H <sub>50</sub> OSi                                                                              | C <sub>20</sub> H <sub>42</sub> O                                                                            |
| 1-Heneicosanol, TMS derivative                                                          | C <sub>24</sub> H <sub>52</sub> OSi                                                                              | C <sub>21</sub> H <sub>44</sub> O                                                                            |
| 1-Monopalmitoylglycerol trimethylsilyl ether                                            | C <sub>25</sub> H <sub>54</sub> O <sub>4</sub> Si <sub>2</sub>                                                   | C <sub>19</sub> H <sub>38</sub> O <sub>4</sub>                                                               |
| 1-Tricosanol, TMS derivative                                                            | C <sub>26</sub> H <sub>56</sub> OSi                                                                              | C <sub>23</sub> H <sub>48</sub> O                                                                            |
| 1-Tetracosanol, TMS derivative                                                          | C <sub>27</sub> H <sub>58</sub> OSi                                                                              | C <sub>24</sub> H <sub>50</sub> O                                                                            |
| Glycerol monostearate, 2TMS derivative                                                  | C <sub>27</sub> H <sub>58</sub> O <sub>4</sub> Si <sub>2</sub>                                                   | C <sub>21</sub> H <sub>42</sub> O <sub>4</sub>                                                               |
| 1-Hexacosanol, TMS derivative                                                           | C <sub>29</sub> H <sub>62</sub> OSi                                                                              | C <sub>26</sub> H <sub>54</sub> O                                                                            |
| 1-Octacosanol, TMS derivative                                                           | C <sub>31</sub> H <sub>66</sub> OSi                                                                              | C <sub>28</sub> H <sub>56</sub> O                                                                            |
| 1-Monooleoylglycerol, 2TMS derivative                                                   | C <sub>27</sub> H <sub>56</sub> O <sub>4</sub> Si <sub>2</sub>                                                   | C <sub>21</sub> H <sub>40</sub> O <sub>4</sub>                                                               |
| Benzenepropanoic acid, 3,5-bis(1,1-dimethylethyl)-4-trimethylsilyloxy-, octadecyl ester | C <sub>38</sub> H <sub>70</sub> O <sub>3</sub> Si                                                                | C <sub>18</sub> H <sub>28</sub> O <sub>3</sub>                                                               |

| Sterols                                                    |                                     |                                   |
|------------------------------------------------------------|-------------------------------------|-----------------------------------|
| Compound                                                   | TMS derivative formula              | Molecular formula                 |
| Cholesta-4,6-dien-3-ol, (3β)- (cholestadienol=desmosterol) | C <sub>30</sub> H <sub>52</sub> OSi | C <sub>27</sub> H <sub>44</sub> O |
| Cholest-5-en-3-ol (cholesterol)                            | C <sub>30</sub> H <sub>54</sub> OSi | C <sub>27</sub> H <sub>46</sub> O |
| Ergosta-5,22-dien-3-ol, acetate, (3β,22E)- (ergostadienol) | C <sub>31</sub> H <sub>54</sub> OSi | C <sub>28</sub> H <sub>46</sub> O |
| Ergost-5-en-3 beta- ol, 24S (campesterol)                  | C <sub>31</sub> H <sub>56</sub> OSi | C <sub>28</sub> H <sub>48</sub> O |
| Stigmast-5-en-3-ol, (3β,24S)- (stigmastenol/b-sitosterol)  | C <sub>32</sub> H <sub>58</sub> OSi | C <sub>29</sub> H <sub>50</sub> O |
| Stigmastanol, (3β,5β,24S) (stigmastanol)                   | C <sub>32</sub> H <sub>60</sub> OSi | C <sub>29</sub> H <sub>52</sub> O |

**Table S4.** Organic ratios utilized for unraveling the origins of n-alkanes and n-fatty acids from the GC/MS data.

| Name                                           | Equation                                                                                                                                                                                                                                                                                                                                                                                                                                                                                                                                                                          | Result                               | Interpetation                             |
|------------------------------------------------|-----------------------------------------------------------------------------------------------------------------------------------------------------------------------------------------------------------------------------------------------------------------------------------------------------------------------------------------------------------------------------------------------------------------------------------------------------------------------------------------------------------------------------------------------------------------------------------|--------------------------------------|-------------------------------------------|
| Average Carbon Length (ACL)                    | $ACL = \frac{\sum_{n=11}^{33} n \cdot C_n}{\sum_{n=11}^{33} C_n}$                                                                                                                                                                                                                                                                                                                                                                                                                                                                                                                 | $n - alkanoic\ acids$ $ACL = 18$     | derived from microbial sources [1]        |
| Carbon Preference Index (CPI)                  | $CPI = \frac{1}{2} \left( \frac{C_{13} + C_{15} + C_{17} + C_{19} + C_{21} + C_{23} + C_{25} + C_{27} + C_{29} + C_{31} + C_{33}}{C_{12} + C_{14} + C_{16} + C_{18} + C_{20} + C_{22} + C_{24} + C_{26} + C_{28} + C_{30} + C_{32}} \right) +$ $+ \frac{1}{2} \left( \frac{C_{13} + C_{15} + C_{17} + C_{19} + C_{21} + C_{23} + C_{25} + C_{27} + C_{29} + C_{31} + C_{33}}{C_{14} + C_{16} + C_{18} + C_{20} + C_{22} + C_{24} + C_{26} + C_{28} + C_{30} + C_{32}} \right)$ <div><math display="block">n - alkanoic\ acids</math><math display="block">CPI = 3.73</math></div> |                                      | extant biomass [2, 3]                     |
| Prokaryotic over eukaryotic sources (LMW/HMW ) | $where\ LMW \leq nC_{20}\ and\ HMW \geq nC_{21}$ $\frac{LMW}{HMW} = \frac{\sum_{n=12}^{20} C_n}{\sum_{m=21}^{34} C_m}$                                                                                                                                                                                                                                                                                                                                                                                                                                                            | $n-alkanoic\ acids$ $LMW/HMW = 5.46$ | predominance of prokaryotic origin [4, 5] |

**Table S5.** [M + H - H2O]<sup>+</sup> and [M - H]<sup>-</sup> fragments of fatty acids indentified through ToF-SIMS in sample 95E5/3

| FA    | m/z    | [M + H - H <sub>2</sub> O] <sup>+</sup> | error (ppm) | Intensity (cps) | m/z    | [M - H] <sup>-</sup> | error (ppm) | FA    | Intensity (cps) |
|-------|--------|-----------------------------------------|-------------|-----------------|--------|----------------------|-------------|-------|-----------------|
| C4:1  | 69.03  | C4H5O+                                  | 4.87        | 2184            | 85.03  | C4H5O2-              | 9.54        | C4:1  | -               |
| C4:0  | 71.05  | C4H7O+                                  | 8.64        | 2029            | 87.05  | C4H7O2-              | 12.75       | C4:0  | 979             |
| C5:1  | 83.05  | C5H7O+                                  | 3.63        | 1872            | 99.05  | C5H7O2-              | 26.65       | C5:1  | 1506            |
| C5:0  | 85.06  | C5H9O+                                  | -1.63       | 1005            | 101.06 | C5H9O2-              | -18.87      | C5:0  | -               |
| C6:2  | 95.05  | C6H7O+                                  | 21.58       | 984             | 111.05 | C6H7O2-              | 11.46       | C6:2  | -               |
| C6:1  | 97.07  | C6H9O+                                  | 42.49       | 1280            | 113.06 | C6H9O2-              | 15.72       | C6:1  | -               |
| C6:0  | 99.08  | C6H11O+                                 | -1.61       | 598             | 115.08 | C6H11O2-             | 4.36        | C6:0  | 475             |
| C7:1  | 111.09 | C7H11O+                                 | 47.14       | 601             | 127.08 | C7H11O2-             | 0.00        | C7:1  | 1473            |
| C7:0  | 113.09 | C7H13O+                                 | -10.18      | 218             | 129.09 | C7H13O2-             | 12.20       | C7:0  | 348             |
| C8:1  | 123.10 | C8H13O+                                 | 14.83       | 242             | 141.09 | C8H13O2-             | 9.10        | C8:1  | 1101            |
| C8:0  | 125.10 | C8H15O+                                 | 30.23       | 242             | 143.11 | C8H15O2-             | -8.71       | C8:0  | 377             |
| C9:2  | 137.10 | C9H13O+                                 | 2.76        | 180             | 153.09 | C9H13O2-             | -5.51       | C9:2  | 221             |
| C9:1  | 139.11 | C9H15O+                                 | -7.76       | 91              | 155.11 | C9H15O2-             | 1.79        | C9:1  | 874             |
| C9:0  | 141.13 | C9H17O+                                 | 3.31        | 70              | 157.12 | C9H17O2-             | -25.64      | C9:0  | 311             |
| C10:2 | 151.11 | C10H15O+                                | 13.36       | 84              | 167.10 | C10H15O2-            | -15.08      | C10:2 | 186             |
| C10:1 | 153.13 | C10H17O+                                | -0.53       | 57              | 169.12 | C10H17O2-            | -2.81       | C10:1 | 683             |
| C10:0 | 155.14 | C10H19O+                                | -6.88       | 78              | 171.14 | C10H19O2-            | -18.31      | C10:0 | 428             |
| C11:1 | 167.14 | C11H19O+                                | 20.47       | 48              | 183.14 | C11H19O2-            | -0.46       | C11:1 | 604             |
| C11:0 | 169.16 | C11H21O+                                | 27.98       | 32              | 185.15 | C11H21O2-            | -24.30      | C11:0 | 180             |
| C12:1 | -      | -                                       | -           | -               | 197.15 | C12H21O2-            | -14.90      | C12:1 | 460             |
| C12:0 | 183.18 | C12H23O+                                | 15.03       | 103             | 199.17 | C12H23O2-            | -8.79       | C12:0 | 785             |
| C13:2 | -      | -                                       | -           | -               | 209.19 | C13H21O2-            | 20.11       | C13:2 | 134             |
| C13:1 | 195.18 | C13H23O+                                | 22.32       | 29              | 211.17 | C13H23O2-            | 0.10        | C13:1 | 393             |
| C13:0 | 197.19 | C13H25O+                                | 12.32       | 43              | 213.18 | C13H25O2-            | -20.65      | C13:0 | 407             |
| C14:1 | 209.19 | C14H25O+                                | 20.11       | 78              | 225.19 | C14H25O2-            | 0.34        | C14:1 | 829             |
| C14:0 | 211.22 | C14H27O+                                | 45.24       | 2015            | 227.20 | C14H27O2-            | -4.53       | C14:0 | 5006            |
| C15:1 | 223.21 | C15H27O+                                | 12.17       | 72              | 239.20 | C15H27O2-            | 13.78       | C15:1 | 581             |
| C15:0 | 225.24 | C15H29O+                                | 20.55       | 132             | 241.22 | C15H29O2-            | -8.87       | C15:0 | 3822            |
| C16:2 | 235.22 | C16H27O+                                | 45.62       | 60              | 251.21 | C16H27O2-            | 18.74       | C16:2 | 301             |
| C16:1 | 237.22 | C16H29O+                                | 37.83       | 148             | 253.22 | C16H29O2-            | -4.40       | C16:1 | 2130            |
| C16:0 | 239.25 | C16H31O+                                | 40.77       | 398             | 255.23 | C16H31O2-            | -7.12       | C16:0 | 12537           |
| C17:1 | 251.24 | C17H31O+                                | 29.64       | 40              | 267.23 | C17H31O2-            | -6.73       | C17:1 | 469             |
| C17:0 | 253.25 | C17H33O+                                | 32.45       | 31              | 269.24 | C17H33O2-            | -24.72      | C17:0 | 1330            |
| C18:4 | -      | -                                       | -           | -               | 275.20 | C18H27O2-            | 1.73        | C18:4 | 25              |
| C18:3 | -      | -                                       | -           | -               | 277.21 | C18H29O2-            | -14.76      | C18:3 | 53              |
| C18:2 | 263.24 | C18H31O+                                | 23.04       | 31              | 279.23 | C18H31O2-            | -16.52      | C18:2 | 197             |
| C18:1 | 265.25 | C18H33O+                                | 38.07       | 57              | 281.24 | C18H33O2-            | 0.51        | C18:1 | 774             |
| C18:0 | 267.27 | C18H35O+                                | 61.60       | 74              | 283.26 | C18H35O2-            | -52.44      | C18:0 | 1974            |
| C19:1 | 279.26 | C19H35O+                                | -20.15      | 41              | 295.26 | C19H35O2-            | 4.02        | C19:1 | 90              |
| C19:0 | -      | -                                       | -           | -               | 297.26 | C19H37O2-            | -33.58      | C19:0 | 168             |
| C20:2 | -      | -                                       | -           | -               | 307.27 | C20H35O2-            | -19.65      | C20:2 | 53              |
| C20:1 | -      | -                                       | -           | -               | 309.27 | C20H37O2-            | -31.43      | C20:1 | 128             |
| C20:0 | -      | -                                       | -           | -               | 311.29 | C20H39O2-            | -22.58      | C20:0 | 198             |
| C21:0 | -      | -                                       | -           | -               | 325.30 | C21H41O2-            | -32.07      | C21:0 | 63              |
| C22:0 | -      | -                                       | -           | -               | 339.32 | C22H43O2-            | -25.71      | C22:0 | 190             |
| C23:0 | -      | -                                       | -           | -               | 353.33 | C23H45O2-            | -22.39      | C23:0 | 112             |
| C24:1 | -      | -                                       | -           | -               | 365.33 | C24H45O2-            | -26.53      | C24:1 | 78              |
| C24:0 | -      | -                                       | -           | -               | 367.35 | C24H47O2-            | -21.81      | C24:0 | 408             |
| C25:1 | -      | -                                       | -           | -               | 379.35 | C25H47O2-            | -24.52      | C25:1 | 47              |
| C25:0 | -      | -                                       | -           | -               | 381.36 | C25H49O2-            | -40.99      | C25:0 | 183             |
| C26:1 | -      | -                                       | -           | -               | 393.37 | C26H49O2-            | -49.63      | C26:1 | 51              |
| C26:0 | -      | -                                       | -           | -               | 395.38 | C26H51O2-            | -75.75      | C26:0 | 194             |
| C27:0 | -      | -                                       | -           | -               | 409.39 | C27H53O2-            | 37.80       | C27:0 | 47              |
| C28:0 | -      | -                                       | -           | -               | 423.40 | C28H55O2-            | -5.50       | C28:0 | 41              |
| C29:0 | -      | -                                       | -           | -               | 437.40 | C29H57O2-            | -75.75      | C29:0 | 11              |
| C30:1 | -      | -                                       | -           | -               | 449.45 | C30H57O2-            | 37.80       | C30:1 | 53              |
| C32:1 | -      | -                                       | -           | -               | 477.47 | C32H61O2-            | -5.50       | C32:1 | 34              |

**Table S6.** Fragments of glycerides and wax esters identified by ToF-SIMS in sample 95E5/3

| DG major cations |                                        |             |                 |
|------------------|----------------------------------------|-------------|-----------------|
| m/z              | [M + H -H <sub>2</sub> O] <sup>+</sup> | error (ppm) | Intensity (cps) |
| 409.34           | C25H45O4+                              | 23.85       | 59              |
| 411.37           | C25H47O4+                              | 51.58       | 40              |
| 421.33           | C26H47O4+                              | 5.22        | 30              |
| 423.35           | C26H49O4+                              | 17.05       | 46              |
| 425.38           | C26H49O4+                              | 37.62       | 45              |
| 435.35           | C27H47O4+                              | 3.21        | 22              |
| 437.37           | C27H49O4+                              | 7.43        | 51              |
| 439.39           | C27H51O4+                              | 25.03       | 91              |
| 453.41           | C28H53O4+                              | 41.09       | 31              |
| 465.40           | C29H53O4+                              | 17.21       | 64              |
| 467.42           | C29H55O4+                              | 14.78       | 105             |
| 479.41           | C30H55O4+                              | 0.65        | 55              |
| 481.44           | C30H57O4+                              | 36.22       | 62              |
| 493.43           | C31H57O4+                              | 15.92       | 101             |
| 495.45           | C31H59O4+                              | 21.02       | 307             |
| 509.46           | C32H61O4+                              | 11.35       | 316             |
| 521.46           | C33H61O4+                              | 14.48       | 327             |
| 523.48           | C33H63O4+                              | 17.07       | 1290            |
| 535.48           | C34H63O4+                              | 20.60       | 275             |
| 537.50           | C34H65O4+                              | 22.11       | 758             |
| 549.51           | C35H65O4+                              | 32.40       | 495             |
| 551.51           | C35H67O4+                              | 13.66       | 1729            |
| 563.51           | C36H67O4+                              | 15.24       | 145             |
| 565.53           | C36H69O4+                              | 16.64       | 354             |
| 577.53           | C37H69O4+                              | 25.34       | 206             |
| 579.54           | C37H71O4+                              | 17.78       | 418             |
| 591.55           | C38H71O4+                              | 29.89       | 63              |
| 593.57           | C38H73O4+                              | 28.42       | 74              |
| 605.56           | C39H73O4+                              | 13.34       | 79              |
| 607.58           | C39H75O4+                              | 14.81       | 156             |
| 619.59           | C40H75O4+                              | 38.11       | 24              |
| 621.60           | C40H77O4+                              | 58.91       | 35              |
| 635.62           | C41H79O4+                              | 28.66       | 61              |
| 647.61           | C42H79O4+                              | 13.11       | 28              |
| 649.62           | C42H81O4+                              | 13.02       | 58              |
| 663.62           | C43H85O4+                              | -15.12      | 78              |
| 677.65           | C44H87O4+                              | 3.27        | 50              |
| 691.67           | C45H87O4+                              | 7.73        | 41              |
| 705.70           | C46H89O4+                              | 28.64       | 22              |
| 719.70           | C47H91O4+                              | 15.09       | 18              |
| 733.71           | C48H93O4+                              | 10.24       | 15              |
| 747.71           | C49H95O4+                              | -19.84      | 11              |

| Wax esters |                                                             |             |                 |
|------------|-------------------------------------------------------------|-------------|-----------------|
| m/z        | [M + H -H <sub>2</sub> O] <sup>+</sup>                      | error (ppm) | Intensity (cps) |
| 229.22     | C <sub>14</sub> H <sub>29</sub> O <sub>2</sub> <sup>+</sup> | 14.16       | 89              |
| 243.22     | C <sub>15</sub> H <sub>31</sub> O <sub>2</sub> <sup>+</sup> | -51.00      | 69              |
| 257.25     | C <sub>16</sub> H <sub>33</sub> O <sub>2</sub> <sup>+</sup> | 7.56        | 248             |

| Correspondence between the most abundant diacylglycerides and their fragments obtained via ToF-SIMS |                     |                       |        |                     |             |
|-----------------------------------------------------------------------------------------------------|---------------------|-----------------------|--------|---------------------|-------------|
| Exact mass                                                                                          | Diglyceride formula | Diglyceride structure | m/z    | Ion                 | error (ppm) |
| 540.48                                                                                              | C33H64O5            | DG(16:0/14:0)         | 211.21 | C14H27O+            | 45.24       |
|                                                                                                     |                     |                       | 239.25 | C16H31O+            | 40.77       |
|                                                                                                     |                     |                       | 241.22 | C15H29O2+           | -7.28       |
|                                                                                                     |                     |                       | 243.24 | C15H31O2+/C16H31O2- | 41.03       |
|                                                                                                     |                     |                       | 255.23 | C16H31O2+/C16H31O2- | 9.39        |
|                                                                                                     |                     |                       | 285.25 | C17H33O3+           | 54.11       |
|                                                                                                     |                     |                       | 313.29 | C19H37O3+           | 42.55       |
|                                                                                                     |                     |                       | 225.23 | C18H29O+            | 60.97       |
| 554.49                                                                                              | C34H66O5            | DG(16:0/15:0)         | 225.23 | C15H29O+            | 60.97       |
|                                                                                                     |                     |                       | 239.25 | C16H31O+            | 40.77       |
|                                                                                                     |                     |                       | 255.23 | C16H31O2+/C16H31O2- | 9.39        |
|                                                                                                     |                     |                       | 299.27 | C18H35O3+           | 23.32       |
| 568.51                                                                                              | C35H68O5            | DG(16:0/16:0)         | 239.25 | C16H31O+            | 40.77       |
|                                                                                                     |                     |                       | 255.23 | C16H31O2+           | 9.39        |
|                                                                                                     |                     |                       | 269.25 | C17H33O2+           | 19.00       |
|                                                                                                     |                     |                       | 283.27 | C18H35O2+           | 39.29       |
|                                                                                                     |                     |                       | 299.27 | C18H35O3+           | 23.32       |
| 594.52                                                                                              | C37H70O5            | DG(18:1/16:0)         | 313.29 | C19H37O3+           | 42.55       |
|                                                                                                     |                     |                       | 239.25 | C16H31O+            | 40.77       |
|                                                                                                     |                     |                       | 255.23 | C16H31O2-           | 9.39        |
|                                                                                                     |                     |                       | 265.26 | C18H33O+            | 38.07       |
|                                                                                                     |                     |                       | 281.24 | C18H33O2-           | -12.81      |
| 596.54                                                                                              | C37H72O5            | DG(18:0/16:0)         | 299.27 | C18H35O3+           | 23.32       |
|                                                                                                     |                     |                       | 297.28 | C19H37O2+           | 14.04       |
|                                                                                                     |                     |                       | 313.29 | C19H37O3+           | 42.55       |
|                                                                                                     |                     |                       | 267.28 | C18H35O+            | 19.86       |
|                                                                                                     |                     |                       | 239.25 | C16H31O+            | 40.77       |
| 610.55                                                                                              | C38H74O5            | DG(17:0/18:0)         | 255.23 | C16H31O2-           | 9.39        |
|                                                                                                     |                     |                       | 341.30 | C21H41O3+           | 5.74        |
|                                                                                                     |                     |                       | 299.27 | C18H35O3+           | 23.32       |
|                                                                                                     |                     |                       | 297.28 | C19H37O2+           | 14.04       |
|                                                                                                     |                     |                       | 313.29 | C19H37O3+           | 42.55       |
|                                                                                                     |                     |                       | 267.28 | C18H35O+            | 19.86       |
|                                                                                                     |                     |                       | 253.25 | C17H33O+            | -6.48       |
|                                                                                                     |                     |                       | 267.28 | C18H35O+            | 28.10       |
|                                                                                                     |                     |                       | 269.24 | C17H33O2+           | 19.00       |
|                                                                                                     |                     |                       | 283.26 | C18H35O2+           | 39.29       |
|                                                                                                     |                     |                       | 299.27 | C18H35O3+           | 23.32       |
|                                                                                                     |                     |                       | 313.29 | C19H37O3+           | 40.80       |
|                                                                                                     |                     |                       | 327.30 | C20H39O3+           | 11.82       |
|                                                                                                     |                     |                       | 341.30 | C21H41O3+           | 5.74        |



**Table S7.** Sterol and hopanoid fragments of sample 95E5/3 collected in the Pedroche Fm through ToF-SIMS.

| m/z    | intensity (cps) | Tentative formula | error (ppm) | Compound                                                                              |  |
|--------|-----------------|-------------------|-------------|---------------------------------------------------------------------------------------|--|
| 149.13 | 205             | C11H17+           | 0.23        | B ring fragment sterol/hopanoid fragment                                              |  |
| 161.13 | 130             | C12H17+           | 42.07       |                                                                                       |  |
| 163.15 | 65              | C12H19+           | 20.99       |                                                                                       |  |
| 175.15 | 90              | C13H19+           | 12.13       |                                                                                       |  |
| 177.16 | 41              | C13H21+           | -7.48       |                                                                                       |  |
| 189.17 | 34              | C14H21+           | 14.27       |                                                                                       |  |
| 191.18 | 42              | C14H23+           | 21.60       |                                                                                       |  |
| 203.18 | 31              | C15H23+           | -3.54       |                                                                                       |  |
| 205.19 | 44              | C15H25+           | -29.85      |                                                                                       |  |
| 257.22 | 101             | C19H29+           | -18.76      |                                                                                       |  |
| 259.25 | 17              | C19H31+           | 34.04       |                                                                                       |  |
| 269.20 | 29              | C19H25O+          | 22.14       |                                                                                       |  |
| 367.33 | 189             | C27H43+           | -18.99      | Cholestadienol [M + H - H <sub>2</sub> O]/cholestadiene [M - H]/hopene fragment       |  |
| 368.34 | 166             | C27H44+           | -1.96       |                                                                                       |  |
| 383.33 | 206             | C27H43O+          | 60.22       |                                                                                       |  |
| 369.35 | 219             | C27H45+           | 4.61        | Cholesterol [M + H - H <sub>2</sub> O]/cholestene [M - H]/norhopane & hopene fragment |  |
| 385.35 | 111             | C27H45O+          | 1.85        |                                                                                       |  |
| 386.37 | 67              | C27H46O+          | 33.51       |                                                                                       |  |
| 381.35 | 34              | C28H45+           | 0.72        | [M + H - H <sub>2</sub> O]+                                                           |  |
| 397.34 | 110             | C28H45O+          | 16.47       |                                                                                       |  |
| 383.33 | 186             | C28H47+           | 8.37        | [M + H - H <sub>2</sub> O]+ ergostenol/ergostene [M - H]+                             |  |
| 395.33 | 147             | C28H43O+          | 26.19       |                                                                                       |  |
| 400.37 | 21              | C28H48O+          | -1.79       |                                                                                       |  |
| 397.33 | 22              | C29H49+           | 4.46        | [M + H - H <sub>2</sub> O]+ stigmasterol/[M - H]+ stigmastene                         |  |
| 414.37 | 16              | C29H50O+          | 14.56       |                                                                                       |  |
| 399.40 | 11              | C29H51+           | 6.57        | [M - H]+                                                                              |  |

**Table S8.** Fragments of N-bearing compounds characterized in sample 95E5/3 using ToF-SIMS.

| Main N-bearing ions |                 |                              |  |             |
|---------------------|-----------------|------------------------------|--|-------------|
| m/z                 | Intensity (cps) | Ion                          |  | error (ppm) |
| 18.03               | 183             | NH <sub>4</sub> <sup>+</sup> |  | 42.63       |
| 26.00               | 34915           | CN <sup>-</sup>              |  | 101.43      |
| 42.00               | 24837           | CNO <sup>-</sup>             |  | 49.55       |

| Amines and amine adducts |                 |                |  |             |
|--------------------------|-----------------|----------------|--|-------------|
| m/z                      | Intensity (cps) | M <sup>+</sup> |  | error (ppm) |
| 42.03                    | 1220            | C2H4N+         |  | -8.90       |
| 44.05                    | 1660            | C2H6N+         |  | -0.55       |
| 46.07                    | 87              | C2H8N+         |  | -32.60      |
| 58.07                    | 7056            | C3H8N+         |  | 72.46       |

| N adducts |                 |                      |        |             |
|-----------|-----------------|----------------------|--------|-------------|
| m/z       | Intensity (cps) | [M + N] <sup>+</sup> | M      | error (ppm) |
| 296.33    | 170             | C20H42N+             | C20H42 | -2.62       |
| 324.35    | 31              | C22H46N+             | C22H46 | -40.16      |
| 338.38    | 23              | C23H48N+             | C23H48 | 3.91        |
| 352.39    | 30              | C24H50N+             | C24H50 | -6.67       |
| 366.40    | 36              | C25H52N+             | C25H52 | -9.98       |
| 380.42    | 68              | C26H54N+             | C26H54 | -9.60       |
| 408.45    | 30              | C28H58N+             | C28H58 | -9.78       |
| 422.47    | 31              | C29H60N+             | C29H60 | -15.96      |
| 464.50    | 25              | C32H66N+             | C32H66 | -32.31      |
| 504.59    | 91              | C35H70N+             | C35H70 | 85.37       |
| 562.60    | 57              | C39H80N+             | C39H80 | -48.33      |

| Trialkylamines formed by NH <sub>4</sub> <sup>+</sup> adducts |                 |                                     |                                   |             |
|---------------------------------------------------------------|-----------------|-------------------------------------|-----------------------------------|-------------|
| m/z                                                           | Intensity (cps) | [M + NH <sub>4</sub> ] <sup>+</sup> | Compound                          | error (ppm) |
| 170.20                                                        | 42              | C11H24N+                            | 4-Propyloct-7-en-3-ylazanium      | 53.62       |
| 284.33                                                        | 126             | C19H42N+                            | Cetrimonium                       | -19.40      |
| 368.42                                                        | 85              | C25H54N+                            | Docosyltrimethylaminium           | -36.63      |
| 494.56                                                        | 136             | C34H72N+                            | Dimethylmyristylstearylammonium   | -14.72      |
| 522.59                                                        | 518             | C36H76N+                            | Dimethyl(tetratriacontyl)azanium  | -11.21      |
| 550.62                                                        | 679             | C38H80N+                            | trimethyl(pentatriacontyl)azanium | -18.92      |

**Table S9.** Organics identified by GC-MS in sample 95E5/2 and by ToF-SIMS in sample 95E5/3 as well as their possible sources.

| Sample            | Technique          | Organics                                                                                            | Taxa                                                     |
|-------------------|--------------------|-----------------------------------------------------------------------------------------------------|----------------------------------------------------------|
| 95E5/2            | GC-MS              | Alkanols, Long-chain (>C22) n-alkanols                                                              | Terrestrial higher plants [6, 7]                         |
|                   |                    | Alkanols, Short-chain (<C22) saturated and unsaturated alkanols                                     | Microbes [8, 9]                                          |
|                   |                    | FAs, 10Me-C11 and 10Me-C16                                                                          | Actinomycetes [10, 11]                                   |
|                   |                    | FAs, Iso and anteiso methyl-branched saturated FAs                                                  | Bacteria [12, 13]                                        |
|                   |                    | FAs, Iso-branched C15:0i and C17:0i; or anteiso-branched C15:0a and C17:0a                          | Gram-positive bacteria [13, 14]                          |
|                   |                    | FAs, C18:1 $\omega$ 9                                                                               | Fungi or Gram-positive bacteria [15]                     |
|                   |                    | Sterols, Stigmastanol                                                                               | Vascular plants [16, 17]                                 |
|                   |                    | Sterols, Campesterol                                                                                | Plants [18]                                              |
| 95E5/2 and 95E5/3 | GC-MS and ToF-SIMS | FAs, n-C16:0, n-C18:0 and n-C14:0                                                                   | Bacteria [13]                                            |
|                   |                    | FAs, Even-carbon-numbered with long chain lengths (>C20)                                            | Higher plant inputs [19, 20]                             |
|                   |                    | FAs, Saturated C24:0 (Tetracosanoic acid), C26:0 (Hexacosanoic acid), and C28:0 (Octacosanoic acid) | Vascular plant [21]                                      |
|                   |                    | Sterols in general                                                                                  | Eukaryotes [22]                                          |
|                   |                    | Sterols, Cholesterol                                                                                | Fungi and algae, rarely found in vascular plants [6, 23] |

|        |          |                                                                        |                                                                                                                                 |
|--------|----------|------------------------------------------------------------------------|---------------------------------------------------------------------------------------------------------------------------------|
| 95E5/3 | ToF-SIMS | Sterols, Stigmasterol                                                  | Higher plants [24, 25]                                                                                                          |
|        |          | Hopanoids fragments                                                    | Aerobic and anaerobic bacteria [26-28]                                                                                          |
|        |          | Sterols, Ergosterol                                                    | Fungi [6, 29]                                                                                                                   |
|        |          | Wax esters                                                             | Bacteria (e.g. Acinetobacter, Moraxella, Micrococcus, Fundibacter, Neisseria, Marinobacter, Pseudomonas and inomycetes) [30-33] |
|        |          | Glycerides, DG (30:0) to DG (36:0)<br>together with FAs n-C14 to n-C18 | Bacteria and fungi [34]                                                                                                         |

## References

1. van Dongen, B.E.; Semiletov, I.; Weijers, J.W.H.; Gustafsson, Ö., Contrasting lipid biomarker composition of terrestrial organic matter exported from across the Eurasian Arctic by the five great Russian Arctic rivers. *Global Biogeochem. Cycles* **2008**, *22* (1).
2. Herrera-Herrera, A.V.; Leierer, L.; Jambrina-Enríquez, M.; Connolly, R.; Mallol, C., Evaluating different methods for calculating the Carbon Preference Index (CPI): Implications for palaeoecological and archaeological research. *Org. Geochem.* **2020**, *146*, 104056.
3. Rielley, G.; Collier, R.J.; Jones, D.M.; Eglinton, G., The biogeochemistry of Ellesmere Lake, UK—I: source correlation of leaf wax inputs to the sedimentary lipid record. *Org. Geochem.* **1991**, *17* (6), 901-912.
4. Grimalt, J.; Albaigés, J., Sources and occurrence of C<sub>12</sub>–C<sub>22</sub>n-alkane distributions with even carbon-number preference in sedimentary environments. *Geochim. Cosmochim. Acta* **1987**, *51* (6), 1379-1384.
5. Sánchez-García, L.; Vonk, J.E.; Charkin, A.N.; Kosmach, D.; Dudarev, O.V.; Semiletov, I.P.; Gustafsson, Ö., Characterisation of Three Regimes of Collapsing Arctic Ice Complex Deposits on the SE Laptev Sea Coast using Biomarkers and Dual Carbon Isotopes. *Permafrost and Periglacial Processes* **2014**, *25* (3), 172-183.
6. Kolattukudy, P.E., Chemistry and biochemistry of natural waxes. **1976**.
7. Sargent, J.; Falk-Petersen, S., Ecological investigations on the zooplankton community in Balsfjorden, Northern Norway: lipids and fatty acids in *Meganyctiphanes norvegica*, *Thysanoessa raschi* and *T. inermis* during mid-winter. *Mar. Biol.* **1981**, *62*, 131-137.

8. Robinson, N.; Cranwell, P.; Finlay, B.; Eglinton, G., Lipids of aquatic organisms as potential contributors to lacustrine sediments. *Org. Geochem.* **1984**, *6*, 143-152.
9. Volkman, J.K.; Barrett, S.M.; Blackburn, S.I., Eustigmatophyte microalgae are potential sources of C<sub>29</sub> sterols, C<sub>22</sub>–C<sub>28</sub> n-alcohols and C<sub>28</sub>–C<sub>32</sub> n-alkyl diols in freshwater environments. *Org. Geochem.* **1999**, *30* (5), 307-318.
10. Cantrell, S.A.; Lodge, D.J.; Cruz, C.A.; García, L.M.; Pérez-Jiménez, J.R.; Molina, M., Differential abundance of microbial functional groups along the elevation gradient from the coast to the Luquillo Mountains. *Ecological Bulletins* **2013**, (54), 87-100.
11. Kühn, J.; Schweitzer, K.; Ruess, L., Diversity and specificity of lipid patterns in basal soil food web resources. *PLoS One* **2019**, *14* (8), e0221102.
12. Harwood, J.; Russell, N., *Lipids in Plants and Microbes*. George Allen and Unwin: London, UK, 1984.
13. Kaneda, T., Iso- and anteiso-fatty acids in bacteria: biosynthesis, function, and taxonomic significance. *Microbiol. Mol. Biol. Rev.* **1991**, *55* (2), 288-302.
14. Quideau, S.A.; McIntosh, A.C.; Norris, C.E.; Lloret, E.; Swallow, M.J.; Hannam, K., Extraction and analysis of microbial phospholipid fatty acids in soils. *JoVE* **2016**, (114), e54360.
15. Ruess, L.; Chamberlain, P.M., The fat that matters: soil food web analysis using fatty acids and their carbon stable isotope signature. *Soil Biol. Biochem.* **2010**, *42* (11), 1898-1910.
16. Baker, E.A., Chemistry and morphology of plant epicuticular waxes. *The plant cuticle* **1982**, 139-166.
17. Bianchi, G., Plant waxes. *Waxes: chemistry, molecular biology and functions* **1995**, *6*, 175-222.
18. Du, Y.; Fu, X.; Chu, Y.; Wu, P.; Liu, Y.; Ma, L.; Tian, H.; Zhu, B., Biosynthesis and the roles of plant sterols in development and stress responses. *Int. J. Mol. Sci.* **2022**, *23* (4), 2332.
19. Kolattukudy, P., Cutin, suberin, and waxes. In *Lipids: structure and function*, Elsevier: 1980; pp 571-645.
20. Colombo, J.; Silverberg, N.; Gearing, J., Lipid biogeochemistry in the Laurentian Trough: I—fatty acids, sterols and aliphatic hydrocarbons in rapidly settling particles. *Org. Geochem.* **1996**, *25* (3-4), 211-225.
21. Lebreton, B.; Richard, P.; Galois, R.; Radenac, G.; Pfléger, C.; Guillou, G.; Mornet, F.; Blanchard, G.F., Trophic importance of diatoms in an intertidal *Zostera noltii* seagrass bed: Evidence from stable isotope and fatty acid analyses. *Estuarine, Coastal Shelf Science* **2011**, *92* (1), 140-153.
22. Peters, K.E.; Walters, C.C.; Moldowan, J.M., *The biomarker guide: Volume 1, Biomarkers and isotopes in the environment and*

*human history*. Cambridge University Press: Cambridge, UK, 2007.

23. Awad, A.; Majcherczyk, A.; Schall, P.; Schröter, K.; Schöning, I.; Schrumpf, M.; Ehbrecht, M.; Boch, S.; Kahl, T.; Bauhus, J., Ectomycorrhizal and saprotrophic soil fungal biomass are driven by different factors and vary among broadleaf and coniferous temperate forests. *Soil Biol. Biochem.* **2019**, *131*, 9-18.
24. Volkman, J.K., A review of sterol markers for marine and terrigenous organic matter. *Org. Geochem.* **1986**, *9* (2), 83-99.
25. Hartmann, M.-A., Plant sterols and the membrane environment. *Trends Plant Sci.* **1998**, *3* (5), 170-175.
26. Werne, J.P.; Baas, M.; Sinninghe Damsté, J.S., Molecular isotopic tracing of carbon flow and trophic relationships in a methane - supported benthic microbial community. *Limnol. Oceanogr.* **2002**, *47* (6), 1694-1701.
27. Stadnitskaia, A.; Muyzer, G.; Abbas, B.; Coolen, M.J.L.; Hopmans, E.C.; Baas, M.; Van Weering, T.C.E.; Ivanov, M.K.; Poludetkina, E.; Damsté, J.S.S., Biomarker and 16S rDNA evidence for anaerobic oxidation of methane and related carbonate precipitation in deep-sea mud volcanoes of the Sorokin Trough, Black Sea. *Mar. Geol.* **2005**, *217* (1-2), 67-96.
28. Blumenberg, M.; Krüger, M.; Nauhaus, K.; Talbot, H.M.; Oppermann, B.I.; Seifert, R.; Pape, T.; Michaelis, W., Biosynthesis of hopanoids by sulfate - reducing bacteria (genus *Desulfovibrio*). *Environ. Microbiol.* **2006**, *8* (7), 1220-1227.
29. Ruzicka, S.; Edgerton, D.; Norman, M.; Hill, T., The utility of ergosterol as a bioindicator of fungi in temperate soils. *Soil Biol. Biochem.* **2000**, *32* (7), 989-1005.
30. Fixter, L.M.; Nagi, M.N.; McCormack, J.G.; Fewson, C.A., Structure, distribution and function of wax esters in *Acinetobacter calcoaceticus*. *Microbiology* **1986**, *132* (11), 3147-3157.
31. Wältermann, M.; Hinz, A.; Robenek, H.; Troyer, D.; Reichelt, R.; Malkus, U.; Galla, H.J.; Kalscheuer, R.; Stöveken, T.; Von Landenberg, P., Mechanism of lipid - body formation in prokaryotes: how bacteria fatten up. *Mol. Microbiol.* **2005**, *55* (3), 750-763.
32. Ishige, T.; Tani, A.; Sakai, Y.; Kato, N., Wax ester production by bacteria. *Curr. Opin. Microbiol.* **2003**, *6* (3), 244-250.
33. Wältermann, M.; Steinbüchel, A., Neutral lipid bodies in prokaryotes: recent insights into structure, formation, and relationship to eukaryotic lipid depots. *J. Bacteriol.* **2005**, *187* (11), 3607-3619.
34. Fernández-Remolar, D.C.; Carrizo, D.; Harir, M.; Huang, T.; Amils, R.; Schmitt-Kopplin, P.; Sánchez-García, L.; Gomez-Ortiz, D.; Malmberg, P., Unveiling microbial preservation under hyperacidic and oxidizing conditions in the Oligocene Rio Tinto deposit. *Sci. Rep.* **2021**, *11* (1), 21543.
